# Supplementary material for: Silicon/nitrogen synergistically reinforced flame-retardant PA6 nanocomposites with simultaneously improved anti-dripping and mechanical properties
Source: Royal Society of Chemistry journal article supplement (doi:10.1039/c8ra10325a), 2019-01-01
Supplement: c8ra10325a1.pdf [file c8ra10325a1.pdf]

## Supporting Information

### **Silicon/nitrogen synergistically reinforced flame-retardant PA6 nanocomposites with simultaneously improved anti-dripping and mechanical properties**

Shuo Fan <sup>ab</sup>, Ruchao Yuan <sup>ab</sup>, Dequn Wu <sup>\*ab</sup>, Xueli Wang <sup>c</sup>, Jianyong Yu <sup>c</sup> and Faxue Li <sup>\*ab</sup>

<sup>a</sup> College of Textiles, Donghua University, Shanghai 201620, China. E-mail:  
fxlee@dhu.edu.cn.

<sup>b</sup> Key Laboratory of Textile Science & Technology, Ministry of Education, College of  
Textiles, Donghua University, Shanghai 201620, China.

<sup>c</sup> Innovation Center for Textile Science & Technology, Donghua University, Shanghai  
201620, China.

#### **Corresponding Author**

\* Faxue Li: [fxlee@dhu.edu.cn](mailto:fxlee@dhu.edu.cn). Dequn Wu: [dqwu@dhu.edu.cn](mailto:dqwu@dhu.edu.cn). Tel.: 021-67798677

**Table S1** DSC, TGA and XRD results of PA6, FR-PA6, PA6/MCA and FR-PA6/MCA nanocomposites

| Sample          | $T_g$ (°C) | $T_m$ (°C) | $T_{5\%}$<br>(°C) | $T_{max1}$<br>(°C) | $T_{max2}$<br>(°C) | Char residues (wt %) | $X_c$ (%) |
|-----------------|------------|------------|-------------------|--------------------|--------------------|----------------------|-----------|
| PA6             | 49         | 220        | 387               | -                  | 469                | 0.5                  | 37.8      |
| FR-PA6-6        | 49         | 210        | 389               | -                  | 466                | 1.6                  | 46.7      |
| FR-PA6-9        | 50         | 200        | 387               | -                  | 462                | 2.7                  | 38.4      |
| FR-PA6-12       | 48         | 189        | 390               | -                  | 468                | 3.8                  | 35.3      |
| FR-PA6-9/MCA-6  | 48         | 200        | 331               | 348                | 465                | 4.3                  | 41.6      |
| FR-PA6-9/MCA-8  | 47         | 200        | 334               | 348                | 465                | 3.2                  | 45.6      |
| FR-PA6-9/MCA-10 | 47         | 200        | 331               | 348                | 474                | 2.8                  | 47.8      |
| PA6/MCA-8       | 48         | 220        | 327               | 347                | 463                | 0.1                  | 43.2      |
| FR-PA6-6/MCA-8  | 48         | 210        | 336               | 348                | 463                | 1.0                  | 54.5      |
| FR-PA6-12/MCA-8 | 47         | 189        | 322               | 348                | 453                | 3.7                  | 35.0      |

**Table S2.** Summary of tensile properties of PA6 and FR-PA6

| Samples   | $\sigma$ (MPa) <sup>a</sup> | Yield point stress (MPa) | $\varepsilon$ (%) <sup>b</sup> | $E$ (MPa) <sup>c</sup> |
|-----------|-----------------------------|--------------------------|--------------------------------|------------------------|
| PA6       | 64.4±0.2                    | 67.6±0.3                 | 88±1.2                         | 887±2.5                |
| FR-PA6-6  | 88.6±0.3                    | 66.7±0.2                 | 326±2.6                        | 930±2.6                |
| FR-PA6-9  | 83.5±0.1                    | 58.7±0.2                 | 368±3.2                        | 893±2.8                |
| FR-PA6-12 | 62.4±0.2                    | 46.5±0.1                 | 470±2.2                        | 713±2.0                |

<sup>a</sup> Tensile stress, <sup>b</sup> Elongation at break, <sup>c</sup> Young's modulus

**Table S3.** Possible structural assignments of PA6 decomposed under 700 °C

| R. Time (min) | m/z | Area% | Gas Compound <sup>a</sup>                                                             |
|---------------|-----|-------|---------------------------------------------------------------------------------------|
| 1.44          | 44  | 8.97  | CO <sub>2</sub>                                                                       |
| 1.56          | 54  | 6.91  |    |
| 1.75          | 70  | 1.35  |    |
| 1.83          | 41  | 1.64  |    |
| 1.97          | 66  | 2.86  |    |
| 5.53          | 84  | 0.25  |    |
| 6.76          | 95  | 0.62  |    |
| 6.98          | 97  | 0.76  |    |
| 12.70         | 113 | 71.01 |   |
| 16.54         | 171 | 0.26  |  |

<sup>a</sup> Data from NIST11s.library.

**Table S4.** Possible structural assignments of FR-PA6-9 decomposed under 700 °C

| R. Time (min) | m/z | Area% | Gas Compound <sup>a</sup>                                                             |
|---------------|-----|-------|---------------------------------------------------------------------------------------|
| 1.44          | 44  | 37.02 | CO <sub>2</sub>                                                                       |
| 1.85          | 41  | 2.07  |    |
| 1.99          | 66  | 2.97  |    |
| 2.19          | 90  | 1.07  |    |
| 4.67          | 200 | 0.27  |    |
| 5.53          | 84  | 1.96  |    |
| 6.29          | 188 | 0.25  |    |
| 6.82          | 95  | 0.89  |    |
| 7.04          | 97  | 0.94  |    |
| 12.38         | 113 | 41.66 |  |
| 16.54         | 171 | 0.87  |  |

<sup>a</sup> Data from NIST11s.library.**Table S5.** Possible structural assignments of MCA decomposed at 700 °C

| R. Time (min) | m/z | Area% | Gas Compound <sup>a</sup>                                                             |
|---------------|-----|-------|---------------------------------------------------------------------------------------|
| 1.44          | 44  | 12.30 | CO <sub>2</sub>                                                                       |
| 1.82          | 43  | 15.45 | HN=NH <sub>2</sub>                                                                    |
| 16.27         | 126 | 36.96 | 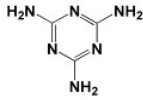 |
| 20.48         | 126 | 35.29 |  |

<sup>a</sup> Data from NIST11s.library.

**Table S6.** Possible structural assignments of FR-PA6-9/MCA-10 decomposed under 350 °C

| R.Time (min) | m/z | Area% | Gas Compound <sup>a</sup>                                                           |
|--------------|-----|-------|-------------------------------------------------------------------------------------|
| 2.40         | 43  | 19.03 | 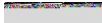 |
| 12.49        | 113 | 51.8  |  |
| 16.59        | 126 | 19.99 |  |
| 17.07        | 170 | 1.14  |  |
| 23.97        | 388 | 0.76  |   |

<sup>a</sup> Data from NIST11s.library.

**Table S7.** Possible structural assignments of FR-PA6-9/MCA-10 decomposed under 700 °C

| R.Time (min) | m/z | Area% | Gas Compound <sup>a</sup>                                                             |
|--------------|-----|-------|---------------------------------------------------------------------------------------|
| 1.44         | 44  | 6.97  | CO <sub>2</sub>                                                                       |
| 1.76         | 70  | 0.98  |  |
| 2.04         | 68  | 1.25  |  |
| 2.88         | 115 | 0.27  |  |
| 4.33         | 200 | 0.19  |  |
| 5.46         | 222 | 3.93  |  |
| 6.81         | 95  | 3.79  |  |
| 7.03         | 97  | 1.39  |  |
| 12.71        | 113 | 75.63 |  |
| 18.26        | 142 | 2.92  |  |

<sup>a</sup> Data from NIST11s.library.

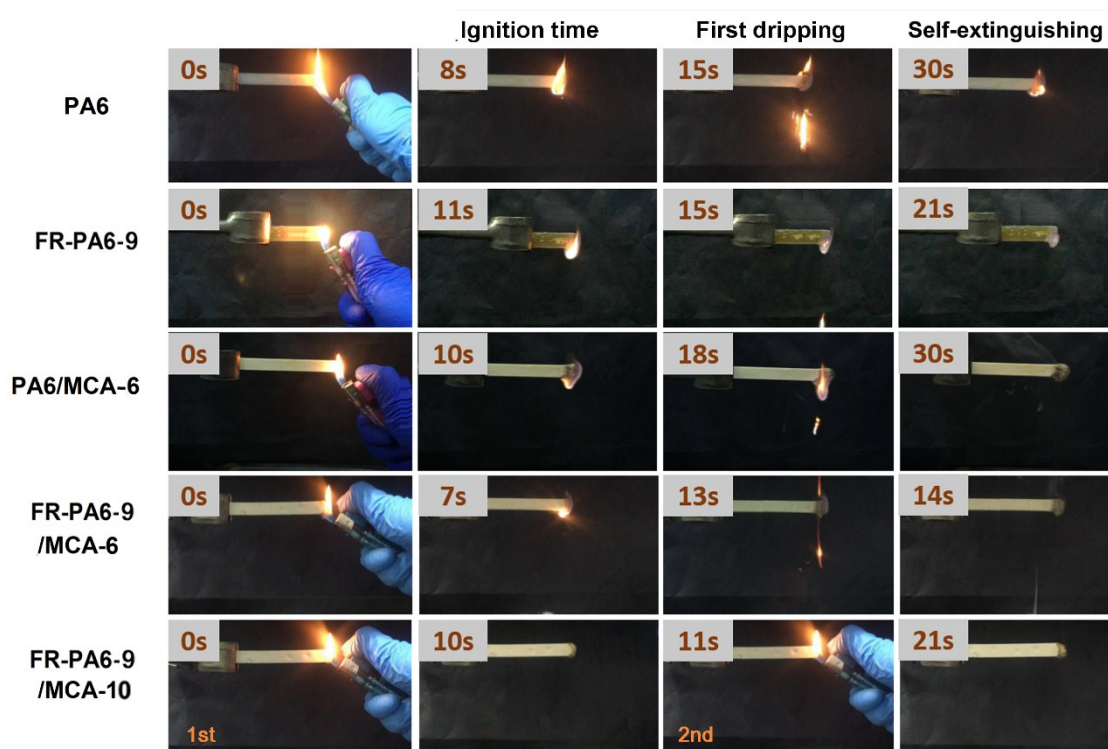

**Fig.S1** Real-time combustion of PA6, FR-PA6, PA6/MCA and FR-PA6-9/MCA in air atmosphere
